# Supplementary material for: Addressing Veteran Homelessness to Prevent Veteran Suicides
Source: Atypon-hosted journal article supplement (doi:10.1176/appi.ps.201700482), 2018-04-02
Supplement: appi.ps.201700482.ds001.pdf [file appi.ps.201700482.ds001.pdf]

Supplementary Table. Comparison of veterans with any lifetime history with and without any lifetime suicidal ideation or attempt

|                               | Any lifetime suicidal ideation or attempt (n= 36) |          | No lifetime suicidal ideation or attempt (n= 53) |          | Effect size<br><i>d</i> or $\Delta\%$ |
|-------------------------------|---------------------------------------------------|----------|--------------------------------------------------|----------|---------------------------------------|
|                               | Mean/ <sup>a</sup><br>Raw N                       | SD/<br>% | Mean/<br>Raw N                                   | SD/<br>% |                                       |
| <b>Sociodemographics</b>      |                                                   |          |                                                  |          |                                       |
| Age                           | 52.5                                              | 9.8      | 56.8                                             | 13.6     | -0.4                                  |
| Gender- Male                  | 26                                                | 84.5     | 48                                               | 90.3     | 5.8                                   |
| Education                     |                                                   |          |                                                  |          |                                       |
| Less than high school         | 0                                                 | 0.0      | 1                                                | 2.8      | -2.8                                  |
| High school                   | 2                                                 | 15.3     | 7                                                | 20.8     | -5.5                                  |
| Some college                  | 29                                                | 72.9     | 24                                               | 47.2     | 25.7                                  |
| Bachelor degree or higher     | 5                                                 | 11.9     | 21                                               | 29.2     | -17.3                                 |
| Race/Ethnicity                |                                                   |          |                                                  |          |                                       |
| White                         | 25                                                | 67.2     | 38                                               | 50.7     | 16.5                                  |
| Black                         | 6                                                 | 27.6     | 7                                                | 15.1     | 12.5                                  |
| Hispanic                      | 1                                                 | 1.7      | 4                                                | 24.7     | -23.0                                 |
| Other                         | 4                                                 | 3.4      | 4                                                | 9.6      | -6.2                                  |
| Marital status                |                                                   |          |                                                  |          |                                       |
| Married/With partner          | 18                                                | 55.2     | 40                                               | 79.5     | -24.3                                 |
| Widowed/Separated             | 13                                                | 25.9     | 8                                                | 13.7     | 12.2                                  |
| Never married                 | 5                                                 | 19.0     | 5                                                | 6.8      | 12.2                                  |
| Employment status             |                                                   |          |                                                  |          |                                       |
| Employed                      | 15                                                | 48.3     | 22                                               | 51.4     | -3.1                                  |
| Retired/Disabled              | 15                                                | 37.9     | 24                                               | 41.7     | -3.8                                  |
| Unemployed                    | 6                                                 | 13.8     | 7                                                | 6.9      | 6.9                                   |
| Income level                  |                                                   |          |                                                  |          |                                       |
| Less than \$15,000            | 7                                                 | 29.3     | 7                                                | 16.7     | 12.6                                  |
| \$15,000-29,999               | 6                                                 | 27.6     | 11                                               | 30.6     | -3.0                                  |
| \$30,000-59,999               | 18                                                | 36.2     | 17                                               | 34.7     | 1.5                                   |
| \$60,000-99,999               | 3                                                 | 5.2      | 14                                               | 15.3     | -10.1                                 |
| \$100,000+                    | 2                                                 | 1.7      | 4                                                | 2.8      | -1.1                                  |
| Geography- Urban <sup>b</sup> | 30                                                | 79.3     | 44                                               | 70.8     | 8.5                                   |
| <b>Combat service</b>         |                                                   |          |                                                  |          |                                       |
| Served in Iraq/Afghanistan    | 3                                                 | 10.3     | 1                                                | 8.2      | 1.9                                   |
| Years of military service     | 6.8                                               | 5.3      | 4.6                                              | 3.7      | .5                                    |
| Combat veteran                | 13                                                | 39.7     | 16                                               | 31.5     | 8.2                                   |
| <b>Clinical status</b>        |                                                   |          |                                                  |          |                                       |

<sup>a</sup> Values shown are weighted means and standard deviations, and raw counts and weighted percentages.<sup>b</sup> Urban status was based on whether the zip code was designated as a metropolitan statistical area.

|                                       |      |      |      |      |      |
|---------------------------------------|------|------|------|------|------|
| PCL-5 score                           | 23.6 | 17.4 | 7.7  | 8.9  | 8.5  |
| Positive PCL-5 screen                 | 11   | 17.9 | 1    | .0   | 17.9 |
| AUDIT-C score                         | 3.0  | 3.8  | 2.4  | 2.9  | .2   |
| Positive AUDIT-C screen               | 10   | 34.5 | 10   | 22.2 | 12.3 |
| PHQ-4 Depression                      | .4   | .5   | .0   | .1   | 1.1  |
| Positive PHQ-4 Depression screen      | 16   | 43.1 | 2    | 2.7  | 40.4 |
| PHQ-4 Anxiety score                   | .3   | .5   | .0   | .0   | .9   |
| Positive PHQ-4 Anxiety screen         | 13   | 34.5 | 0    | .0   | 34.5 |
| SF-8 Physical Component Summary score | 44.6 | 11.4 | 43.3 | 11.4 | .1   |
| SF-8 Mental Component Summary score   | 43.3 | 11.3 | 53.3 | 7.3  | -1.1 |
| MOS Social Support scale              | 14.8 | 6.1  | 18.7 | 5.3  | -.7  |

Note: Clinical Measures included the Posttraumatic Stress Disorder-Checklist for DSM-5 (PCL-5; 1); Alcohol Use Disorders Identification Test-Consumption (AUDIT-C; 2); Patient Health Questionnaire-4 (PHQ-4; 3); Short Form Health Survey (SF-8; 4), and a 5-item version of the Medical Outcomes Study (MOS) Social Support scale (5).

## References

1. Weathers FW, Litz BT, Keane TM, et al.: The PTSD Checklist for DSM-5 (PCL-5). Washington, DC: U.S. Department of Veterans Affairs, National Center for Posttraumatic Stress Disorder, 2013
2. Bush K, Kivlahan DR, McDonnell MB: The AUDIT alcohol consumption questions (AUDIT-C): An effective brief screening test for problem drinking: Ambulatory Care Quality Improvement Project (ACQUIP): Alcohol Use Disorders Identification Test. Arch Intern Med 158:1789-95, 1998
3. Kroenke K, Spitzer RL, Williams JBW, et al.: An ultra-brief screening scale for anxiety and depression: the PHQ-4. Psychosomatics 50:613-21, 2009
4. QualityMetric: SF-8 Health Survey: QualityMetric, 2014
5. Sherbourne CD, Stewart AL: The MOS social support survey. Soc Sci Med 32:705-14, 1991
